# Supplementary material for: Functional Haplotype of LIPC Induces Triglyceride-Mediated Suppression of HDL-C Levels According to Genome-Wide Association Studies
Source: PubMed Central journal article supplement (PMC7910859; doi:10.3390/genes12020148), 2021-01-22
Supplement: genes-12-00148-s001.pdf [file genes-12-00148-s001.pdf]

## **Supplementary method 1.**

### **Definitions of hypertension, diabetes mellitus, obesity, current smoking, and metabolic syndrome**

Hypertension was defined as a systolic blood pressure (BP) of  $\geq 140$  mmHg and/or a diastolic BP of  $\geq 90$  mmHg or a self-reported history of hypertension. Diabetes mellitus (DM) was defined as a fasting plasma glucose level  $\geq 126$  mg/dL, a glycohemoglobin (HbA1C) value  $\geq 6.5\%$ , or a self-reported history of DM. Hyperlipidemia was defined as total cholesterol levels of  $> 200$  mg/dL, triglyceride levels of  $> 200$  mg/dL or a self-reported history of hyperlipidemia. Obesity was defined if body mass index (BMI) was  $25 \text{ kg/m}^2$  or more. Current smoking was defined as those who smoked cigarettes regularly at the time of survey. Participants with 3 or more of the following attributes are defined as having metabolic syndrome: (1) BP of at least 130/85 mm Hg and/or with past history of hypertension; (2) triglycerides level of at least 150 mg/dL; (3) high-density lipoprotein cholesterol (HDL-C) level of less than 40 mg/dL for men and less than 50 mg/dL for women or with past history of hyperlipidemia; (4) fasting plasma glucose of at least 100 mg/dL and/or with past history of DM; and, (5) waist circumference greater than 90 cm for men and greater than 80 cm for women.

**Supplementary Figure 1. A conceptual model for mediation analysis**

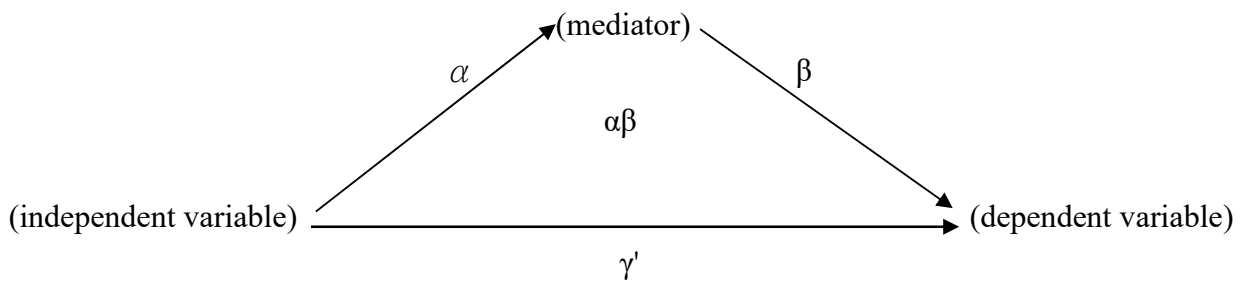

$\alpha$  : unstandardized coefficient for the association between independent variable and mediator.

$\beta$  : unstandardized coefficient for the association between mediator and dependent variable (when adjusting for independent variable.)

Mediation (indirect) effect =  $\alpha\beta$

Direct effect =  $\gamma'$

Total effect =  $\alpha\beta + \gamma'$

**Supplementary Table 1. Genome-wide association study for HDL-C in the TWB population after adjustment for TG**

| CHR | SNP        | BP       | A1 | BETA     | STAT   | <i>p</i> | BETA     | STAT   | <i>p1</i> |
|-----|------------|----------|----|----------|--------|----------|----------|--------|-----------|
| 16  | rs3764261  | 56993324 | A  | 0.03193  | 10.92  | 2.57E-27 | 0.03208  | 12.17  | 2.14E-33  |
| 16  | rs247617   | 56990716 | A  | 0.03186  | 10.87  | 4.52E-27 | 0.03193  | 12.08  | 6.15E-33  |
| 16  | rs173539   | 56988044 | T  | 0.02132  | 8.156  | 4.79E-16 | 0.02177  | 9.231  | 4.52E-20  |
| 16  | rs4783961  | 56994894 | A  | 0.02081  | 8.021  | 1.43E-15 | 0.02253  | 9.634  | 1.07E-21  |
| 16  | rs11508026 | 56999328 | T  | 0.0181   | 7.527  | 6.58E-14 | 0.01722  | 7.919  | 3.19E-15  |
| 16  | rs1532624  | 57005479 | A  | 0.01832  | 7.497  | 8.23E-14 | 0.01726  | 7.799  | 8.17E-15  |
| 16  | rs711752   | 56996211 | A  | 0.01576  | 6.951  | 4.30E-12 | 0.01503  | 7.329  | 2.87E-13  |
| 16  | rs7499892  | 57006590 | T  | -0.01984 | -6.799 | 1.24E-11 | -0.01937 | -7.341 | 2.62E-13  |
| 16  | rs9939224  | 57002732 | T  | -0.02005 | -6.329 | 2.79E-10 | -0.01913 | -6.677 | 2.82E-11  |
| 16  | rs1800775  | 56995236 | C  |          |        |          | -0.01287 | -6.452 | 1.26E-10  |
| 16  | rs1864163  | 56997233 | A  |          |        |          | -0.0186  | -6.325 | 2.85E-10  |
| 16  | rs1800774  | 57015545 | T  |          |        |          | -0.01721 | -5.984 | 2.39E-09  |
| 15  | rs261334   | 58726744 | G  | 0.01471  | 6.441  | 1.35E-10 | 0.01655  | 8.022  | 1.41E-15  |
| 15  | rs7170361  | 58718998 | C  | 0.01192  | 5.497  | 4.13E-08 | 0.01293  | 6.603  | 4.65E-11  |
| 15  | rs633695   | 58725839 | A  | -0.01219 | -5.35  | 9.38E-08 | -0.01309 | -6.361 | 2.27E-10  |
| 15  | rs1077834  | 58723479 | C  | 0.01127  | 5.077  | 4.04E-07 | 0.01325  | 6.609  | 4.47E-11  |
| 15  | rs2043085  | 58680954 | T  | 0.01078  | 4.996  | 6.14E-07 | 0.01228  | 6.293  | 3.50E-10  |
| 15  | rs1532085  | 58683366 | A  | 0.0108   | 4.977  | 6.77E-07 | 0.01206  | 6.151  | 8.58E-10  |
| 15  | rs11635491 | 58719741 | A  | 0.01119  | 4.957  | 7.50E-07 | 0.01227  | 6.015  | 1.98E-09  |
| 15  | rs8033940  | 58724842 | G  | -0.01143 | -4.809 | 1.58E-06 | -0.01289 | -6.007 | 2.09E-09  |
| 15  | rs1800588  | 58723675 | T  | 0.01068  | 4.717  | 2.48E-06 | 0.01325  | 6.487  | 1.00E-10  |

CHR, chromosome; SNP, single nucleotide polymorphism; BP, base position; BETA, beta coefficient;

*p*: adjusted for age, sex, BMI, and smoking; *p1*: adjusted for age, sex, BMI, smoking, and TG

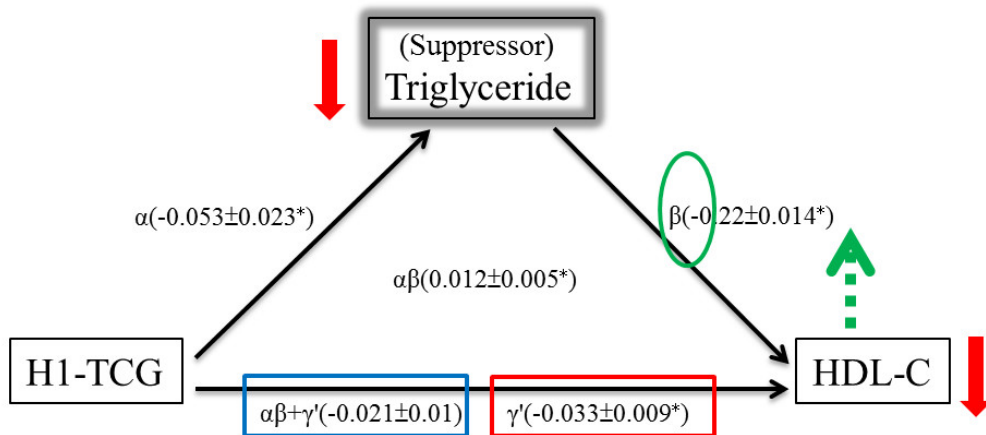

### Supplementary Figure 2. Suppression effect of TG

A three-variable mediation model: TG level as a mediator of association between *LIPC* haplotype and HDL-C. Linear or binary regression models were used to assess the path associations of  $\alpha$ ,  $\beta$ ,  $\gamma'$ , and

$\alpha\beta + \gamma'$
